# Supplementary material for: Thrombosis and Hyperinflammation in COVID-19 Acute Phase Are Related to Anti-Phosphatidylserine and Anti-Phosphatidylinositol Antibody Positivity
Source: MDPI journal article supplement (doi:10.3390/biomedicines11082301), 2023-08-18
Supplement: s1 [file s1]

**Supplementary Table S1.** Laboratory data at hospital admission and 48 h of hospitalization of APLA positive and APLA negative patients.

|                                   | Reference values | APLA positive (N=30) <sup>†</sup> | APLA negative (N=62) <sup>†</sup> | p-Value <sup>‡</sup> |
|-----------------------------------|------------------|-----------------------------------|-----------------------------------|----------------------|
| Haematocrit (%)                   | 36.0-45.0        |                                   |                                   |                      |
| Admission                         |                  | 41.0 (5.1)                        | 41.5 (4.7)                        | 0.75                 |
| 48h                               |                  | 39.0 (4.5)                        | 39.6 (4.1)                        | 0.36                 |
| Haemoglobin (g/dl)                | 12.0-15.0        |                                   |                                   |                      |
| Admission                         |                  | 13.9 (1.8)                        | 13.8(1.9)                         | 0.97                 |
| 48h                               |                  | 13.3 (1.6)                        | 13.2 (1.4)                        | 0.55                 |
| MCV (fl)                          | 80.0-98.0        |                                   |                                   |                      |
| Admission                         |                  | 89.3 (6.9)                        | 88.6 (4.9)                        | 0.29                 |
| 48h                               |                  | 89.2 (6.3)                        | 87.8 (4.7)                        | 0.26                 |
| Leukocytes (x10 <sup>9</sup> /l)  | 4.0-11.0         |                                   |                                   |                      |
| Admission                         |                  | 6.2 (2.6)                         | 6.3 (4.0)                         | 0.88                 |
| 48h                               |                  | 6.8 (3.8)                         | 6.0 (3.4)                         | 0.43                 |
| PMN (x10 <sup>9</sup> /l)         | 2.0-7.0          |                                   |                                   |                      |
| Admission                         |                  | 4.5 (2.0)                         | 4.7 (4.2)                         | 0.95                 |
| 48h                               |                  | 5.5 (3.2)                         | 4.3 (2.6)                         | 0.25                 |
| Lymphocytes (x10 <sup>9</sup> /l) | 1.2-3.5          |                                   |                                   |                      |
| Admission                         |                  | 0.9 (0.3)                         | 0.9 (0.4)                         | 0.89                 |
| 48h                               |                  | 0.7 (0.4)                         | 0.9 (0.6)                         | 0.09                 |
| Monocytes (x10 <sup>9</sup> /l)   | 0.1-1.0          |                                   |                                   |                      |
| Admission                         |                  | 0.4 (0.4)                         | 0.5 (0.4)                         | 0.62                 |
| 48h                               |                  | 0.4 (0.3)                         | 0.5 (0.3)                         | 0.94                 |
| Platelets (x10 <sup>9</sup> /l)   | 150-400          |                                   |                                   |                      |
| Admission                         |                  | 170.0 (100.5)                     | 213.0 (102.3)                     | 0.45                 |
| 48h                               |                  | 189.0 (133.0)                     | 234.0 (165.0)                     | 0.32                 |
| PT (INR, ratio)                   | 0.7-1.3          |                                   |                                   |                      |
| Admission                         |                  | 1.14 (0.13)                       | 1.12 (0.15)                       | 0.53                 |
| 48h                               |                  | 1.12 (0.18)                       | 1.12 (0.15)                       | 0.49                 |
| aPTT (seconds)                    | 21-35            |                                   |                                   |                      |
| Admission                         |                  | 29.0 (4.0)                        | 28.0 (4.0)                        | 0.07                 |
| 48h                               |                  | 29.0 (5.0)                        | 28.0 (5.8)                        | 0.42                 |
| D-dimer (ng/ml)                   | <240             |                                   |                                   |                      |
| Admission                         |                  | 399.0 (676.3)                     | 298.0 (392.3)                     | 0.17                 |
| 48h                               |                  | 421.0 (520.0)                     | 292.5 (428.5)                     | 0.14                 |
| Creatinine (mg/dL)                | 0.51-0.91        |                                   |                                   |                      |
| Admission                         |                  | 0.92 (0.29)                       | 0.93 (0.34)                       | 0.76                 |
| GFR ml/min/1.73m <sup>2</sup>     | >90              |                                   |                                   |                      |
| Admission                         |                  | 78.12 (23.05)                     | 83.16 (26.19)                     | 0.56                 |
| LDH (IU/l)                        | 120-246          |                                   |                                   |                      |
| Admission                         |                  | 650 (265)                         | 558 (291)                         | 0.38                 |
| CRP (mg/l)                        | <10              |                                   |                                   |                      |
| Admission                         |                  | 107.4 (85.2)                      | 74.9 (130.4)                      | 0.37                 |
| 48h                               |                  | 89.4 (76.7)                       | 90.2 (87.1)                       | 0.88                 |
| Ferritin (ng/ml)                  | 25-250           |                                   |                                   |                      |
| Admission                         |                  | 620.0 (1331.0)                    | 472.0 (496.0)                     | 0.16                 |
| 48h                               |                  | 525.0 (1279.8)                    | 517.0 (611.0)                     | 0.40                 |
| Procalcitonin (ng/ml)             | <0.1             |                                   |                                   |                      |
| Admission                         |                  | 0.1 (0.1)                         | 0.1 (0.1)                         | 0.56                 |
| 48h                               |                  | 0.2 (0.1)                         | 0.1 (0.1)                         | 0.11                 |
| IL-6 (pg/ml)                      | <4.3             |                                   |                                   |                      |
| Admission                         |                  | 55.3 (31.9)                       | 36.0 (46.7)                       | 0.18                 |

|     |  |             |             |      |
|-----|--|-------------|-------------|------|
| 48h |  | 37.8 (61.4) | 27.2 (52.7) | 0.29 |
|-----|--|-------------|-------------|------|

†Median (IQR); aPTT, activated partial thromboplastin time; CRP, C-reactive protein; GFR, glomerular filtration rate; IL-6, interleukin-6; LDH, lactate dehydrogenase; MCV, mean corpuscular volume; PMN, polymorphonuclear cells; PT, prothrombin time. ‡Mann-Whitney U test.
